# Supplementary material for: The Protective Effect of Neighbourhood Collective Efficacy On Family Violence and Youth Antisocial Behaviour in Two South Korean Prospective Longitudinal Cohorts
Source: Springer Nature journal article supplement (doi:10.1007/s10802-021-00869-y), 2021-09-22

**Online Resource 1** Flow charts of included participants in the confirmatory factor analyses and mediation analyses after adjusting for covariates across samples using full information maximum likelihood

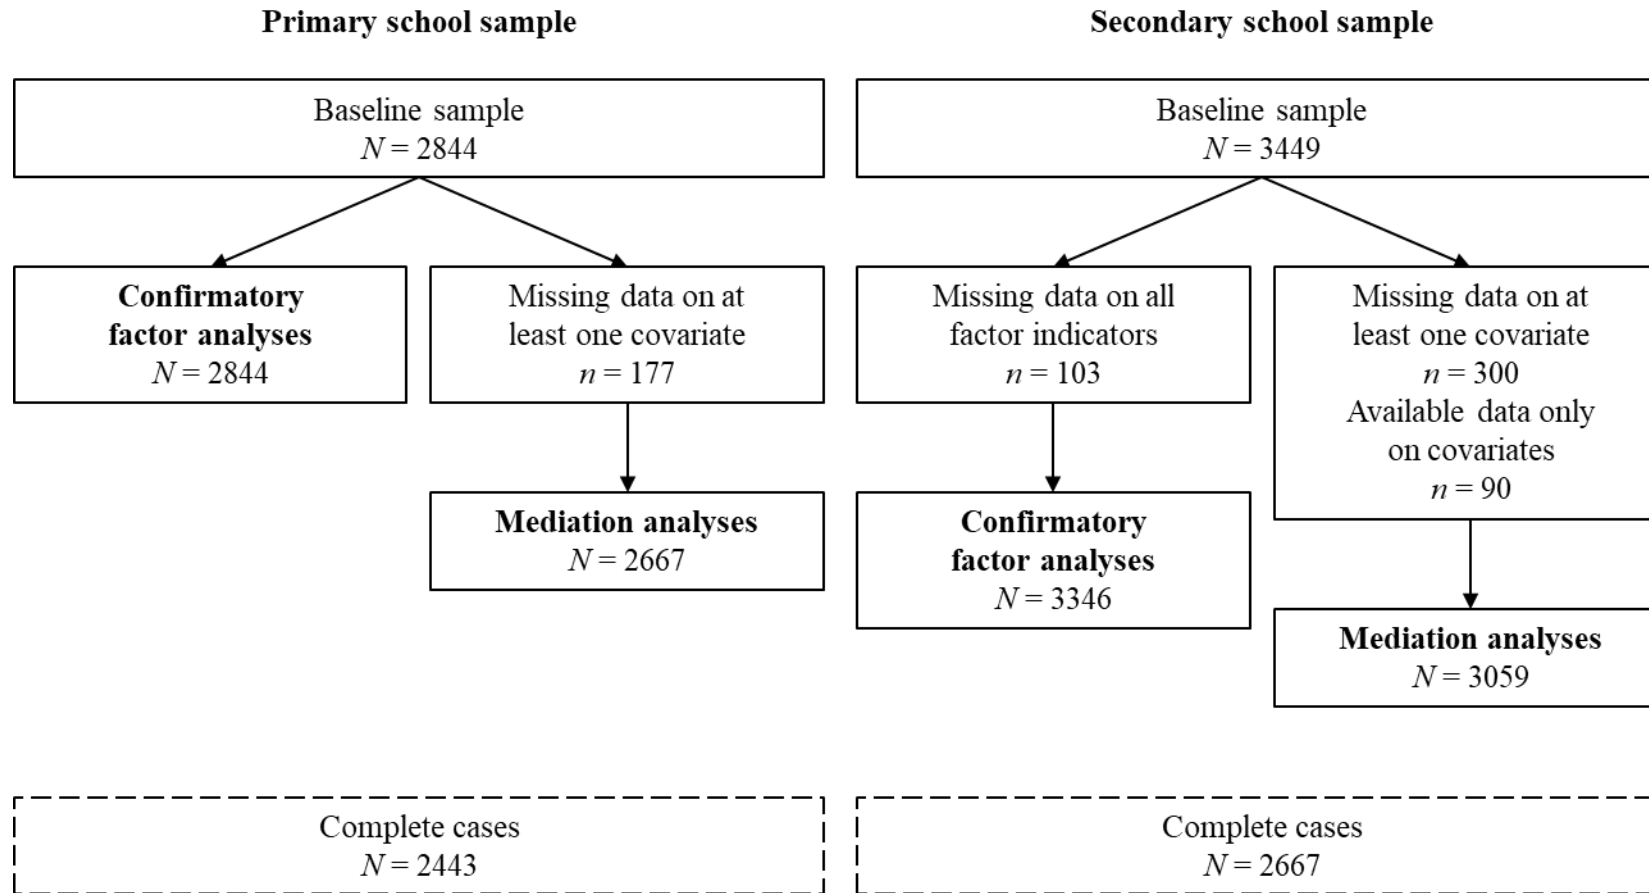

Supplement: MOESM1 [file 19688462]
