# Supplementary material for: The Protective Effect of Neighbourhood Collective Efficacy On Family Violence and Youth Antisocial Behaviour in Two South Korean Prospective Longitudinal Cohorts
Source: Springer Nature journal article supplement (doi:10.1007/s10802-021-00869-y), 2021-09-22
Supplement: MOESM2 [file 19688462]

**Online Resource 2** Comparison between the baseline sample and those included in the mediation analyses adjusted for covariates, separated by cohort

| Variables                               | Baseline        | <i>versus</i>                        | Mediation       |
|-----------------------------------------|-----------------|--------------------------------------|-----------------|
|                                         | Mean (SD) or %  | <i>r</i> ( <i>p</i> ) or OR (95% CI) | Mean (SD) or %  |
| <b><i>Primary school sample</i></b>     |                 |                                      |                 |
| Child's sex (male)                      | 54              | 0.99 (0.89-1.10)                     | 53              |
| House ownership (other) <sup>a</sup>    | 38              | 0.98 (0.88-1.10)                     | 37              |
| Family composition (other) <sup>b</sup> | 5               | <b>0.73 (0.55-0.97)</b>              | 3               |
| Paternal education (0-7)                | 3.93 (1.19)     | .00 (= .78)                          | 3.94 (1.19)     |
| Maternal education (0-7)                | 3.50 (1.02)     | .00 (= .91)                          | 3.50 (1.01)     |
| Monthly income (0-3000) <sup>c</sup>    | 302.14 (176.52) | .01 (= .49)                          | 305.48 (176.82) |
| <b><i>Secondary school sample</i></b>   |                 |                                      |                 |
| Child's sex (male)                      | 50              | 0.99 (0.89-1.09)                     | 50              |
| House ownership (other) <sup>a</sup>    | 31              | 0.96 (0.86-1.07)                     | 30              |
| Family composition (other) <sup>b</sup> | 7               | <b>0.75 (0.61-0.93)</b>              | 5               |
| Paternal education (0-7)                | 4.74 (1.31)     | .00 (= .91)                          | 4.74 (1.29)     |
| Maternal education (0-7)                | 4.25 (1.11)     | .01 (= .66)                          | 4.23 (1.09)     |
| Monthly income (0-3000) <sup>c</sup>    | 299.73 (216.90) | .00 (= .92)                          | 299.19 (214.46) |

**Note.** Bold values indicate statistically significant group differences at  $p < .05$ . Pearson's correlation coefficient  $r$  and  $p$ -values were derived from independent  $t$ -tests. <sup>a</sup> Reference is 'own house'. <sup>b</sup> Reference is 'living with biological father and mother'. <sup>c</sup> In units of £10,000.
