# Supplementary material for: The Protective Effect of Neighbourhood Collective Efficacy On Family Violence and Youth Antisocial Behaviour in Two South Korean Prospective Longitudinal Cohorts
Source: Springer Nature journal article supplement (doi:10.1007/s10802-021-00869-y), 2021-09-22
Supplement: MOESM3 [file 19688462]

**Online Resource 3** Sample proportions for each item used to measure youth antisocial behaviour, separated by cohort

|                                               | <b>Primary school</b><br>( <i>N</i> = 2844) |               | <b>Secondary school</b><br>( <i>N</i> = 3449) |               |
|-----------------------------------------------|---------------------------------------------|---------------|-----------------------------------------------|---------------|
|                                               | <b>Age 11</b>                               | <b>Age 12</b> | <b>Age 16</b>                                 | <b>Age 17</b> |
|                                               | %                                           | %             | %                                             | %             |
| Unauthorised school absence                   | 8                                           | 5             | 6                                             | 6             |
| Group bullying                                | 10                                          | 9             | 2                                             | 1             |
| Severe teasing or banter                      | 10                                          | 7             | 4                                             | 3             |
| Threatening                                   | 2                                           | 2             | 1                                             | 1             |
| Drinking                                      | 5                                           | 6             | 37                                            | 45            |
| Smoking                                       | 1                                           | 2             | 12                                            | 14            |
| Severely beating others                       | 2                                           | 2             | 3                                             | 2             |
| Robbing                                       | 1                                           | 1             | 1                                             | 1             |
| Stealing                                      | 2                                           | 2             | 2                                             | 2             |
| Running away                                  | 2                                           | 1             | 3                                             | 3             |
| Fare evasion                                  | 2                                           | 3             |                                               | N/A           |
| Shouting at their teacher                     | 6                                           | 6             |                                               | N/A           |
| Cheating on exam                              | 7                                           | 9             |                                               | N/A           |
| Misappropriating expenses for school supplies | 10                                          | 10            |                                               | N/A           |
| Gang fight                                    |                                             | N/A           | 1                                             | 1             |

*Note.* N/A = Item not available in cohort.
