# Supplementary material for: The Protective Effect of Neighbourhood Collective Efficacy On Family Violence and Youth Antisocial Behaviour in Two South Korean Prospective Longitudinal Cohorts
Source: Springer Nature journal article supplement (doi:10.1007/s10802-021-00869-y), 2021-09-22
Supplement: MOESM4 [file 19688462]

**Online Resource 4** Standardised factor loadings of the models examining family violence as a mediator of the relationship between neighbourhood collective efficacy and youth antisocial behaviour (model 1) and the model examining youth antisocial behaviour as a mediator of the relationship between neighbourhood collective efficacy and family violence (model 2), separated by cohort

|                                                                                                                  | Primary school sample |         | Secondary school sample |         |
|------------------------------------------------------------------------------------------------------------------|-----------------------|---------|-------------------------|---------|
|                                                                                                                  | Model 1               | Model 2 | Model 1                 | Model 2 |
| <b>Neighbourhood collective efficacy</b>                                                                         |                       |         |                         |         |
| <i>My neighbours have close relationships with each other</i>                                                    | .32                   | .32     | .57                     | .58     |
| <i>My neighbours trust each other</i>                                                                            | .39                   | .39     | .64                     | .64     |
| <i>Elderly neighbours will scold me if I smoke or drink in the neighbourhood</i>                                 | .44                   | .43     | .72                     | .72     |
| <i>My neighbours will intervene or report to the police if I am assaulted by other kids in the neighbourhood</i> | .62                   | .61     | .75                     | .74     |
| <i>I will let elderly neighbours know if my friends smoke or drink in the neighbourhood</i>                      | .62                   | .64     | .53                     | .53     |
| <i>I will intervene or report to the police if my friends are assaulted in the neighbourhood</i>                 | .65                   | .65     | .54                     | .54     |
| <b>Family violence</b>                                                                                           |                       |         |                         |         |
| <i>I frequently see my parents verbally abuse each other</i>                                                     | .58                   | .62     | .59                     | .69     |
| <i>I frequently see one of my parents beat the other one</i>                                                     | .70                   | .76     | .71                     | .79     |
| <i>I am often verbally abused by parents</i>                                                                     | .79                   | .83     | .82                     | .83     |
| <i>I am often severely beaten by parents</i>                                                                     | .72                   | .75     | .73                     | .78     |
| <b>Youth antisocial behaviour</b>                                                                                |                       |         |                         |         |
| <i>Unauthorised school absence</i>                                                                               | .56                   | .54     | .76                     | .73     |
| <i>Group bullying</i>                                                                                            | .64                   | .73     | .65                     | .70     |
| <i>Severe teasing or banter</i>                                                                                  | .76                   | .78     | .72                     | .76     |
| <i>Threatening</i>                                                                                               | .91                   | .74     | .88                     | .86     |
| <i>Drinking</i>                                                                                                  | .58                   | .53     | .74                     | .70     |
| <i>Smoking</i>                                                                                                   | .77                   | .79     | .82                     | .78     |
| <i>Severely beating others</i>                                                                                   | .81                   | .68     | .81                     | .80     |
| <i>Robbing</i>                                                                                                   | .88                   | .78     | .71                     | .89     |
| <i>Stealing</i>                                                                                                  | .76                   | .78     | .64                     | .58     |
| <i>Running away</i>                                                                                              | .67                   | .59     | .79                     | .78     |
| <i>Fare evasion</i>                                                                                              | .61                   | .61     | N/A                     | N/A     |
| <i>Shouting at teacher</i>                                                                                       | .61                   | .64     | N/A                     | N/A     |
| <i>Cheating on exam</i>                                                                                          | .66                   | .55     | N/A                     | N/A     |
| <i>Misappropriating expenses for school supplies</i>                                                             | .63                   | .53     | N/A                     | N/A     |
| <i>Gang fight</i>                                                                                                | N/A                   | N/A     | .76                     | .78     |

*Note.* All factor loadings show  $p < .001$ . N/A = Item not available in cohort.
